# Supplementary material for: Loss of intestinal sympathetic innervation elicits an innate immune driven colitis
Source: PubMed Central journal article supplement (PMC6322236; doi:10.1186/s10020-018-0068-8), 2019-01-07

A

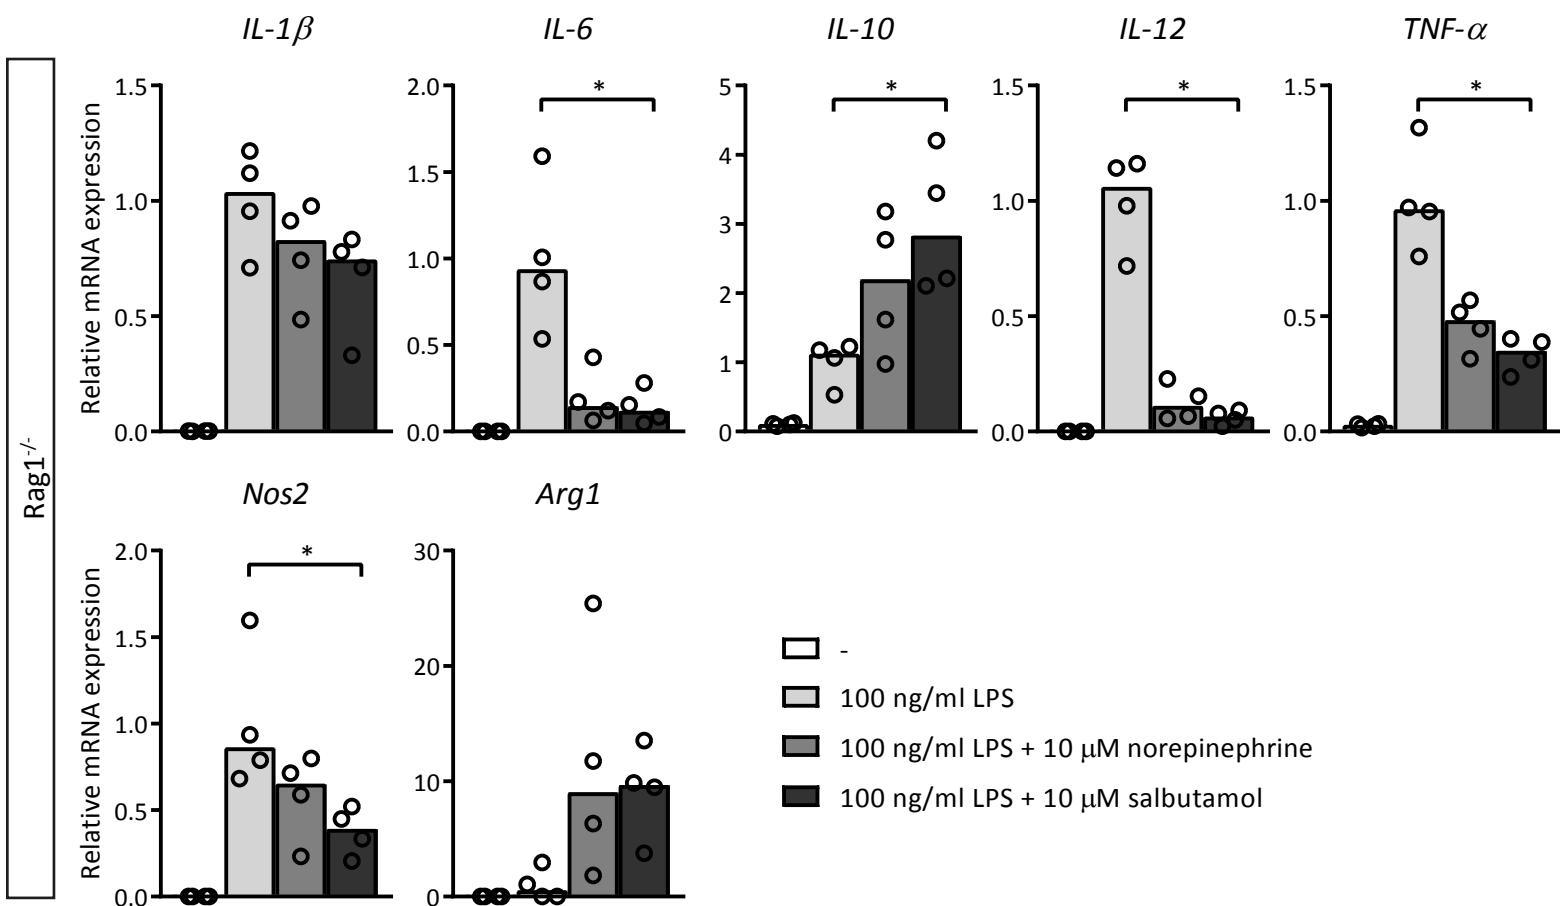

B

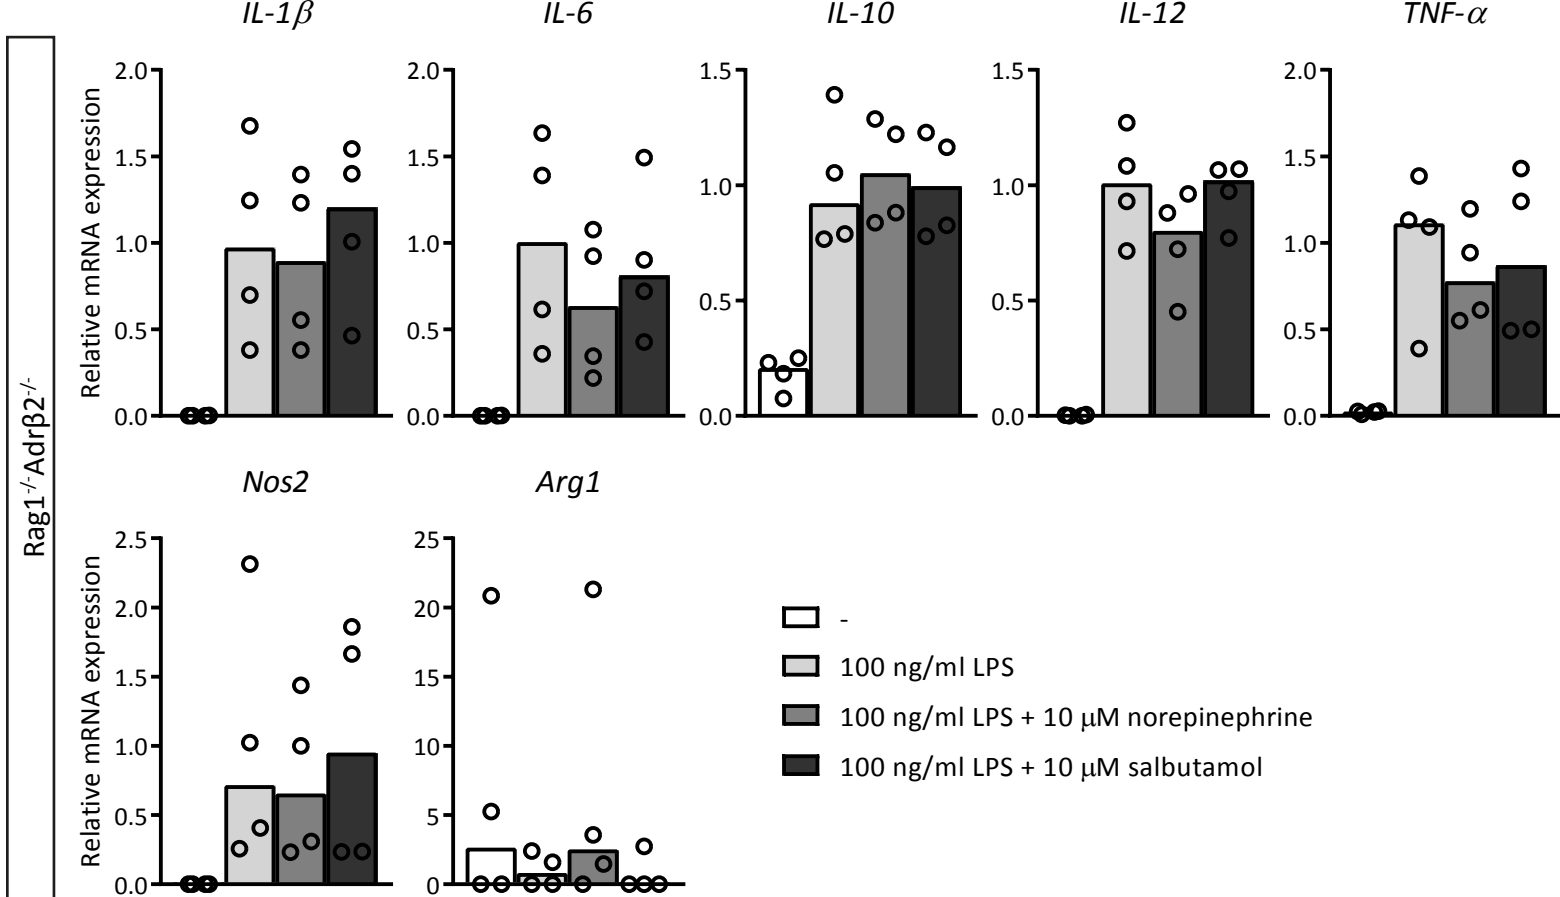

Supplement: 10020_2018_68_MOESM3_ESM.pdf [file 10020_2018_68_MOESM3_ESM.pdf]
